# Supplementary material
Source: PubMed Central journal article supplement (PMC5959285)
Supplement: NIHMS961149-supplement-Suppl.pdf [file NIHMS961149-supplement-Suppl.pdf]

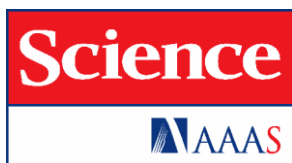

## Supplementary Materials for

### **Innovative scattering analysis shows that hydrophobic disordered proteins are expanded in water**

Joshua A. Riback, Micayla A. Bowman, Adam M. Zmyslowski, Catherine R. Knoverek, John M. Jumper, James R. Hinshaw, Emily B. Kaye, Karl F. Freed, Patricia L. Clark,\*  
Tobin R. Sosnick\*

\*Corresponding author. Email: pclark1@nd.edu (P.L.C.); trsosnic@uchicago.edu (T.R.S.)

Published 13 October 2017, *Science* **358**, 238 (2017)

DOI: 10.1126/science.aan5774

#### **This PDF file includes:**

Materials and Methods

Supplementary Text

Figs. S1 to S6

Tables S1 and S2

Captions for movies S1 and S2

References

#### **Other supplementary material for this manuscript includes the following:**

Movies S1 and S2

## **Supplemental Materials:**

### Protein expression and purification.

PNt - A PNt coding sequence optimized for expression in *E. coli* was purchased commercially (Invitrogen), cloned into plasmid pET21b and overexpressed in *E. coli* BL21(DE3)pLysS. PNt was isolated from insoluble inclusion bodies using procedures described previously (20, 21) and purified as follows. Inclusion bodies were isolated from cell lysates and solubilized in 6 M Gdn. Denaturant was removed first by dilution to 1.2 M Gdn followed by dialysis against 50 mM Tris pH 7.5 to a final concentration of Gdn <1 mM. The soluble fraction after dialysis was purified by strong anion exchange chromatography (Source 15Q, GE Healthcare) using a linear gradient from 0 to 150 mM NaCl. Fractions containing PNt as confirmed by SDS-PAGE were pooled and supplemented with 5 mM EDTA. Pooled fractions were concentrated and purified further using a HiLoad 10/60 Superdex 200 preparative grade column (GE Healthcare) equilibrated with 50 mM Tris pH 7.5, 5 mM EDTA. Purified PNt (100-200 uM) was stored at 4°C in 50mM Tris pH 7.5, 5 mM EDTA.

FhuA - The FhuA plug coding sequence (residues 19-161 from pdb:1BY3) from *E. coli* was purchased commercially (Invitrogen) and cloned into plasmid pET21b containing an N-terminal His8-Protein G-TEV sequence tag for expression and purification (27). Cells were grown to an optical density of 0.8 at 600 nm in 1 L of LB/ampicillin medium in baffled flasks shaking at 200 RPM at 37 C. Expression of FhuA was induced with 1mM IPTG at 37C for 4h, after which cells were harvested at 5000 g for 15 minutes before storage of cell pellets at -80C. Cell pellets were solubilized in lysis buffer (8 M urea 300 mM NaCl 50 mM TrisHCl pH 8.0) and lysed by sonication. Solubilized inclusion bodies were applied to 10mL of high density nickel iminodiacetic acid (IDA) beads pre-equilibrated with lysis buffer and washed with 5 column volumes (CV) each of lysis buffer then wash buffer (300 mM NaCl 20 mM imidazole 50 mM NaPi pH 8.0). Protein was eluted in 5 mL fractions using elution buffer (300 mM NaCl 250 mM imidazole 50 mM NaPi pH 8.0). Protein containing fractions (measured by absorbance at 280 nm) were pooled, 1 mg of TEV protease in 1 mL of TEV protease buffer (50% glycerol 1 mM EDTA 5 mM DTT 0.01% Triton X-100 50 mM TrisHCl pH 8.0) was added, and the mixture was dialyzed against 2 L of TEV cleavage buffer (1 mM EDTA 50 mM TrisHCl pH 8.0) at room temperature for 12+ hours (overnight). Dialyzed and cleaved protein was passed through the same nickel beads (equilibrated with 5 CV wash buffer) to remove the cleaved His8-DesG tags. Purified and cleaved, FhuA plug was dialyzed against 20 mM NaHCO<sub>3</sub> overnight and lyophilized for long term storage.

RNaseA- Protein was prepared as previously described (14, 23). Briefly, protein powder was solubilized in DTT and denaturant (>5M Gdn) and equilibrated at room temperature for an hour prior to injection onto the SEC column.

### Far-UV CD.

Far-UV CD spectra were collected as previously described (29) using a Jasco J-815 spectropolarimeter. Purified PNt was diluted to 5 uM in 25 mM sodium phosphate pH 7.5. Cosolutes were added as indicated.

### NMR.

NMR spectra were obtained using 500 and 600 MHz spectrometers with Bruker AVANCE III consoles. HSQC spectra were run under non-denaturing conditions.

## SAXS.

Data were taken at the BioCAT beamline at the Advanced Photon Source (Argonne National Lab) using a GE Lifesciences Superdex 200 SEC column with the scattering presented as  $q=4\pi \sin\theta/\lambda$ , where  $2\theta$  is the scattering angle and  $\lambda$  is the X-ray wavelength (1 Å).

### Code for simulations and fitting scattering data.

Code and associated files necessary to produce simulations and the analysis can be accessed at <https://github.com/SuperScienceJew/SAXSonIDPs>. Additionally, our webserver <http://sosnick.uchicago.edu/SAXSonIDPs> is available for fitting SAXS data with our MFF( $v, R_g$ ).

*Simulations and generation of MFF.* Calculations were performed at the University of Chicago Research Computing Center using a version our *Upside* molecular dynamics program (30) modified for C $\beta$ -level interactions. Each of the five simulations started from different random conformations and run for 11,000 time steps, saving a conformation every 20 time steps. Each simulation was run under a Hamiltonian replica exchange protocol with 30 replicas having different C $\beta$ -C $\beta$  interaction strengths with Monte Carlo ( $\phi, \psi$ ) pivot moves. The first 1000 time steps were discarded for equilibration. For the selected 500 individual conformations, side chains were added with TreePack (31) and scattering profiles were determined with the FOXS program (32) with the command “foxs -s 80 -q 0.4 --excluded\_volume 1.0 --water\_layer\_c2 2.0” accounting for an expected hydration layer of  $\sim 0.03$  electron/Å<sup>3</sup> above bulk water. Explicit solvent simulations for fixed PNT conformations (33) yielded similar scattering curves (**Fig. S6**). For each simulation, an  $R_g$  is calculated based on the C $\alpha$  atom positions. For each C $\beta$ -C $\beta$  interaction strength, the scattering profiles were made dimensionless (transformed into  $I(qR_g)/I_0$  with interpolation), and averaged for the five independent simulations and their standard error was determined. To calculate  $v$  for each interaction strength, intra-chain RMS distances between C $\alpha$  residues were calculated ( $|i-j|>15$ ) and fit to  $\langle R_{i-j}^2 \rangle^{0.5} = R_0 |i-j|^v$  weighted by the errors from the five replicates in Mathematica (**Fig. 3B, lines**). Across the 30 interaction strengths investigated,  $v = 0.35-0.6$ . The dependence on  $v$  of the (averaged) dimensionless scattering profile for all the C $\beta$ -C $\beta$  interaction strengths was smoothed with splines in Mathematica, yielding a continuous function, the molecular form factor MFF( $qR_g, v$ ).

*Fitting the MFF.* Data were fit to  $I_0 * \text{MFF}(qR_g, v)$  using NonlinearModelFit in Mathematica over the range  $0.01 \leq q \leq 0.15 \text{Å}^{-1}$  except for 4 and 8 M Gdn, which were fit over  $0.01 \leq q \leq 0.1 \text{Å}^{-1}$  and  $0.01 \leq q \leq 0.075 \text{Å}^{-1}$ , respectively. When fitting MFFs to simulations, simulations were interpolated over  $0.01 \leq q \leq 0.15 \text{Å}^{-1}$  with  $q^{-1}$  weighting, to mimic the  $q$ -dependence of the experimental errors.

*Scattering for a SARW from renormalization theory.* Calculations utilized the analytical form (Eq. 4.2 in reference (34)) coded into Mathematica using numerical integration routine for the conversion from  $\beta$  to  $q$  using the Series approximation (original form,  $\beta * (1 - 13/96) \sim \beta * 0.864583 = q^2 R_g^2$ ; revised form,  $\beta * 0.864453 = q^2 R_g^2$ ).

*Bioinformatics.* The non-redundant dataset of folded proteins from the PDB was curated with the PISCES (35) server using a percentage identity cutoff of 25%, a resolution cutoff of 3.0 Å, the R-factor cutoff of 0.3, and selecting chain lengths  $>40$  residues. The reported hydrophobicity is presented as a Z-score according to the Hopp-Woods scale (36). The fraction of charge residues was calculated using the number of Lys, Arg, Asp, and Glu residues. The

boundary of region predicted to be a poor solvent(7) (hydrophobicity value above -0.2, **Fig 1C**) was obtained by conversion to the Hopp-Woods scale using linear regression between the two scales from proteins in the curated set. The boundary value from simulation was a fraction total charge below 0.25 (26).

**Author Contributions:** Author contributions: JAR, MAB, JH, PLC, TRS designed research; JAR, MAB, AZ, CRK, JH, EBK, PLC, TRS performed research; JAR, MAB, CRK, EBK, JJ, KFF, PLC, TRS contributed reagents/analytic tools; JAR, MAB, CRK, JH, PLC, TRS analyzed data; and JAR, MAB, PLC, TRS, wrote the paper.

### Supplementary Text:

*Comparison to existing polymer models.* We compared our data to a variety of polymer models (**Fig. S2A**). The Debye random walk (RW) model has the same  $\nu=0.5$  value as a chain in a  $\theta$  solvent. This model often is applied to describe unfolded chains even though it represents an unphysical situation where the polypeptide chain can pass through itself (37). The swollen Gaussian coil (SGC) model treats self-avoidance by assuming the residue-residue distance distribution is affected by  $\nu$ :  $P(r_{ij}) \propto e^{-[3r_{ij}^2/(2\langle r^2_{ij} \rangle)]}$  where  $\langle r^2_{ij} \rangle \propto |i-j|^{2\nu}$  (7, 38, 39). A third procedure uses conformational space renormalization (RN) to account for excluded volume in a SARW (34, 40). As far as we are aware, it has not yet been applied to the scattering of disordered proteins. We also include the Guinier Approximation, where the scattering curve at low  $q$  is modeled as a Gaussian,  $I(q) = I_0 e^{-1/3(qR_g)^2}$ . Although this procedure is more appropriate for globular objects, it often is used to describe disordered states using a limited data range  $qR_g \leq 1$ .

Significant deviations are observed between the experimental data and both the Debye and the SGC models, even at low  $q$  ( $qR_g \sim 1.5$ ) (**Fig. S2A**). The scattering in water closely matches the RN model out to  $qR_g \sim 3$ , where the data exhibits a downturn. In high denaturant, the RN model performs well even out to  $qR_g \sim 5$ . The close agreement with the RN model supports the common view that chemically denatured proteins are well approximated as a SARW (1).

*Alternative methods to determine solvent quality.* The SGC model described above has the potential to determine  $\nu$ . However, the model does a poor job of describing the SAXS data (**Fig. S2A**). The only other method we are aware of to obtain  $\nu$  from a single SAXS measurement involves dimensional analysis. Here, the chain is assumed to be a fractal aggregate with  $I(q) \sim q^{-1/D_m}$  at high  $q$  and fractal dimension  $D_m \sim 1/\nu$  (14). To test the validity of this approach, we analyzed the scattering profiles from the simulations as we know their true  $\nu$  value. We find both that  $D_m$  generally is not equal to  $1/\nu$ , and it often has an error of  $\pm 0.05$  units; further, the fitted  $D_m$  is very sensitive to the  $q$  range (**Fig S2B**). Hence, we do not recommend this approach, especially as our MFF can easily provide  $\nu$  with an error of only  $\sim 0.01$ .

*Nonlinearity in denaturation measurements.* Chemical denaturation is often used to measure protein stability, tracking signals such as fluorescence or CD. The free energy difference between the native state and the DSE often is approximated with a linear dependence on denaturant,  $\Delta G([\text{den}]) = \Delta G^0 - m^0[\text{den}]$ , with the slope proportional to the decrease in accessible surface area (ASA). Such data often is fit with a constant  $m^0$ , suggesting that the  $\Delta\text{ASA}$  upon folding is unchanged at different denaturant concentrations. However, the observed decrease in  $\nu$  at lower denaturant indicates that the ASA of the DSE does decrease at lower denaturant. To quantify this effect, we calculated the ASA for our simulated ensembles at different values of  $\nu$ ,

but the effect is small. The ASA decreases by 8% going from water ( $\nu=0.54$ ) to 2 M Gdn ( $\nu=0.59$ ) and 2% from 2 to 4 M Gdn, and the impact on linearity of  $\Delta G$  with denaturant is minimal (Fig. S5C).

Figures:

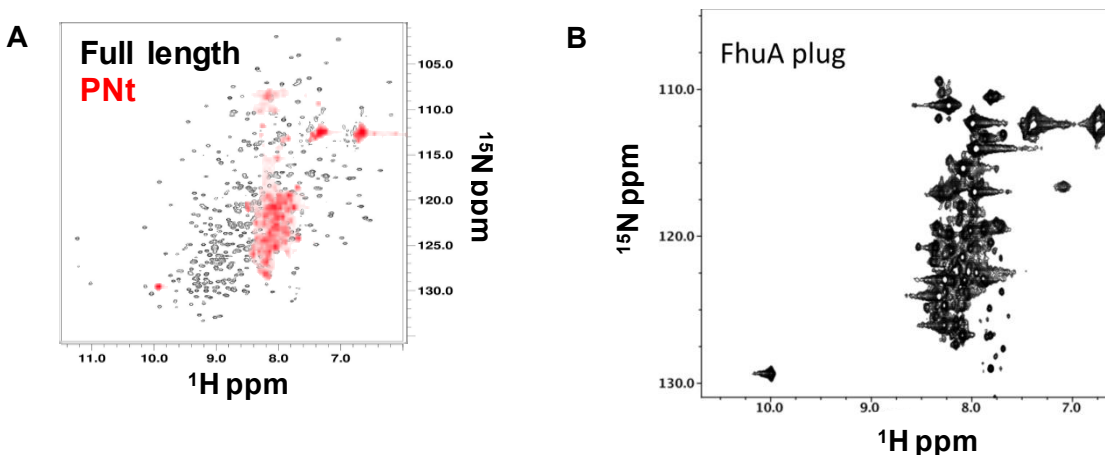

**Fig. S1.** NMR on disordered proteins.  $^1\text{H}$   $^{15}\text{N}$  HSQC spectrum of (A) PNt and (B) FhuA, showing disordered peaks characteristic of unfolded protein.

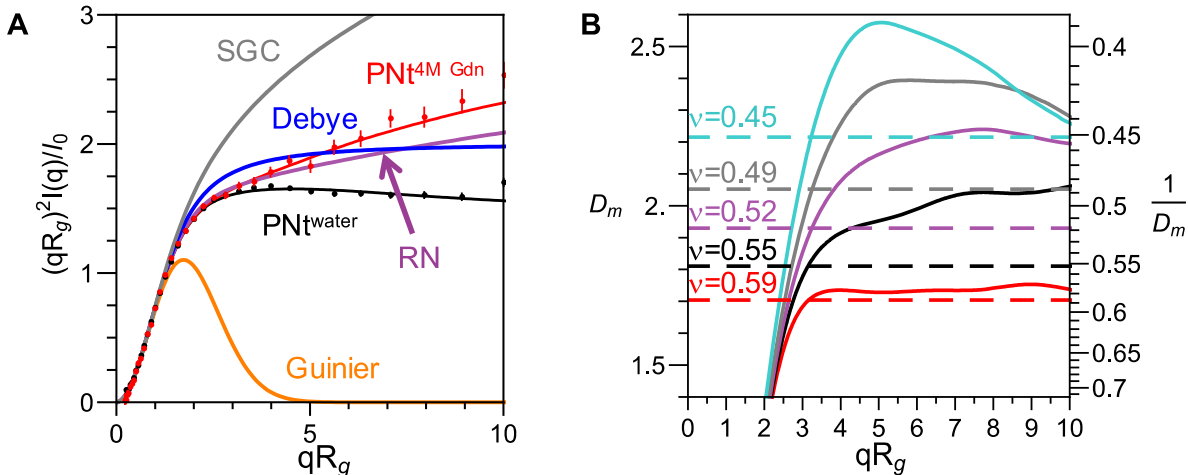

**Fig. S2.** Comparison to polymer models and alternative methods to extract solvent quality. (A) Comparison of PNt data to Swollen Gaussian Coil (SGC) (39), Renormalization (RN) (34), Debye and Guinier models (37). (B) Fractal dimension calculated for five simulations shown in Fig. 3B as a function of fitted  $qR_g$  range  $[qR_g-1, qR_g+1]$  (solid lines). The  $\nu$  value of each simulation is shown as a dotted line at  $D_m=1/\nu$ . Only for the SARW simulation at  $qR_g > 3$  does this method reliably recapitulate the correct  $\nu$ . See **Supplementary Text** for further discussion.

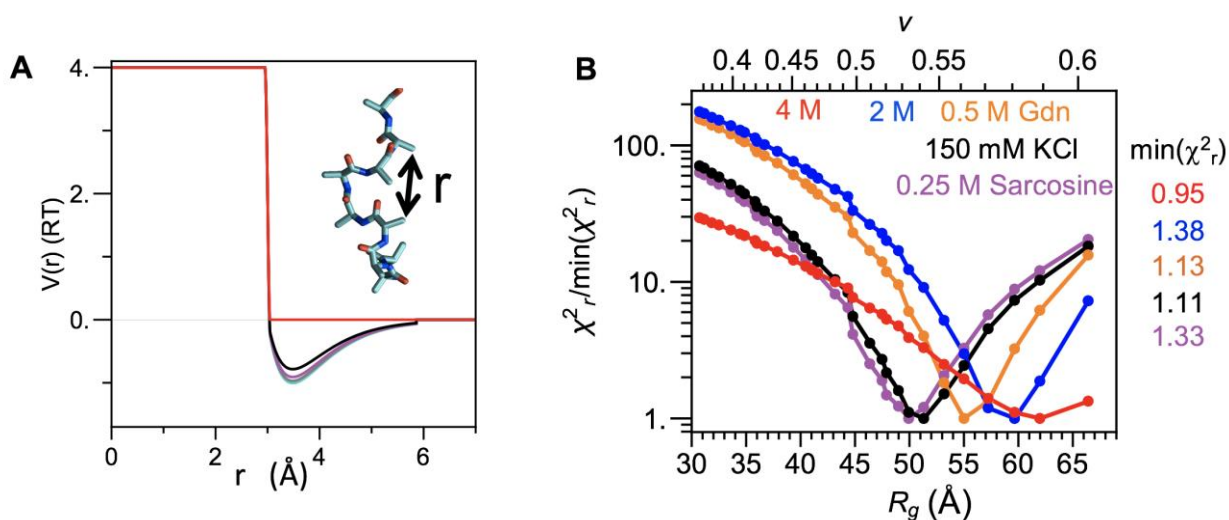

**Fig. S3.** Simulations potential and match to data. **(A)** Distance dependence for five of the 30 different C $\beta$ -C $\beta$  interaction potentials used in the simulations; one hard sphere and four attractive potentials are shown. **(B)** Error in the fit to the data (colors correspond to experimental data in **Fig 2A**) to each of the 30 simulations obtained with different C $\beta$ -C $\beta$  potentials (represented as points). The y-axis is the normalized error, the ratio of the error of fitting the data to each simulation to the minimum error ( $\min(\chi^2_r)$ ). Minimum error is listed on the right.

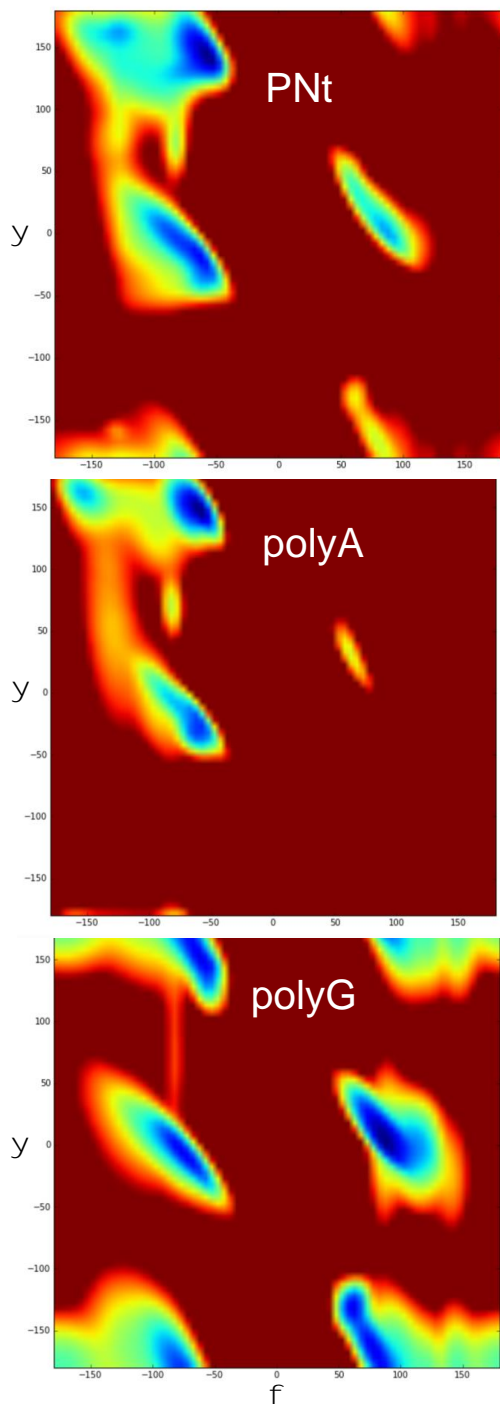

**Fig. S4.** Ramachandran maps utilized. These maps are used as inputs for backbone dihedral potentials in homopolymer simulations. Plotted on a  $\log_e$  scale from most favorable to  $5 \log_e$  units above.

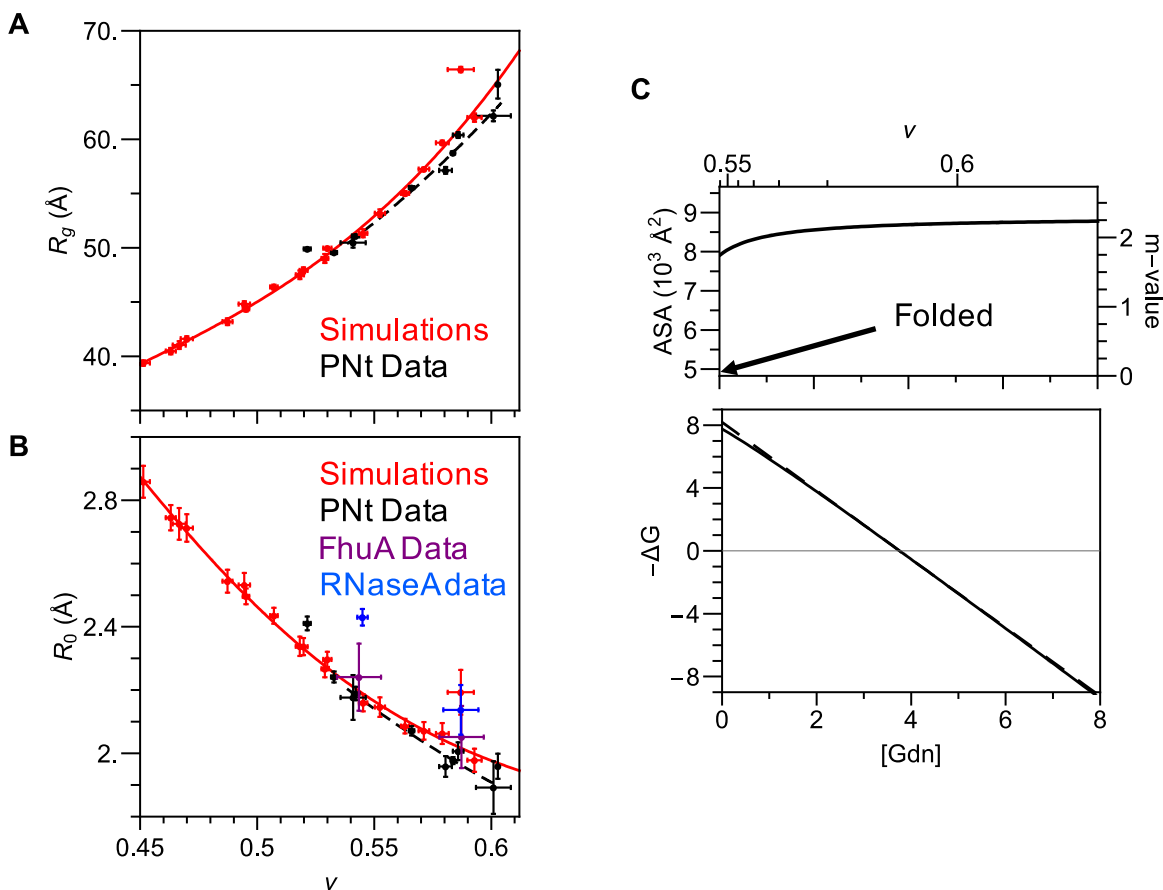

**Fig. S5.** Extrapolation of simulation to different lengths and ASA values. **A)**  $R_g$  and  $v$  pairs from PNt data (black) and from 30 simulations (red) with quartic trend line. **B)** Corresponding plot for the pre-factor  $R_0 = R_g N^{-v}$ , along with data for FhuA and RNase A. **C)** Top, expected increase in the accessible surface area (ASA) and  $m$ -value of unfolded ubiquitin relative to the folded state. Bottom, expected stability of ubiquitin based on expected ASA decrease and linear extrapolation method. Ubiquitin thermodynamics based on (12).



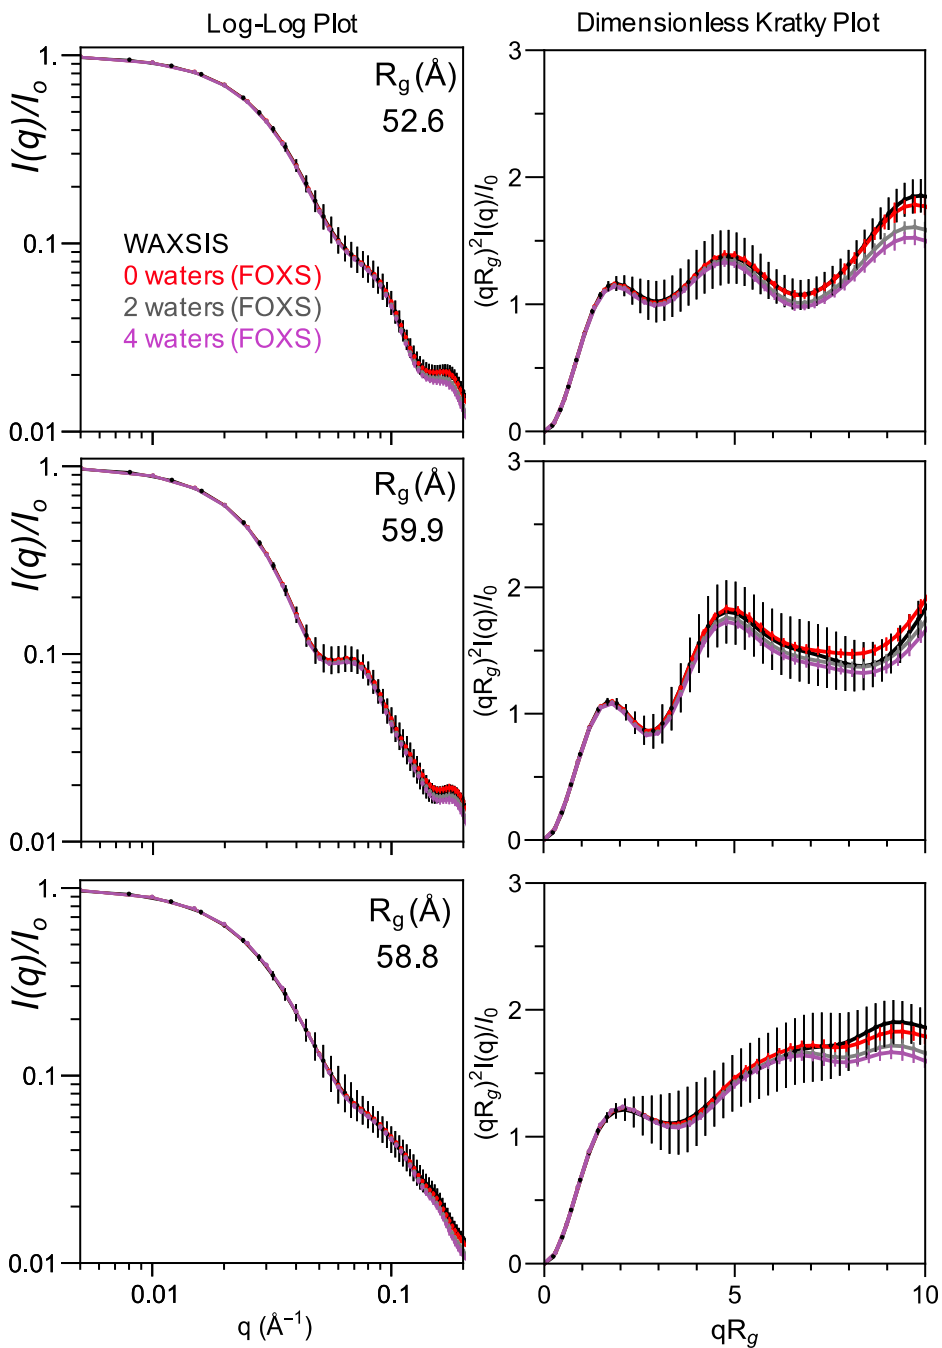

**Fig. S6.** SAXS profiles are insensitive to the solvent model over pertinent data range. Comparison between the scattering profiles for three PNt SARW conformations determined with explicit solvent from WAXSIS (33) and the profiles determined with implicit solvent from FOXS (32). The variation of the hydration layer shell parameter in FOXS was yielded only minor changes to scattering profiles. The scattering pattern in each row is for a different conformation.

**Tables:**

**Table S1:** Fitting SAXS patterns of ensembles from **Fig. 3** with MFFs. The upper and lower values in each box are the  $R_g$  (Å) and  $\nu$  determined by fitting the associated ensemble to the listed MFF.  $MFF_{PNT,334}$  is based on simulations using individual Ramachandran maps for PNT's sequence with uniform interactions at all C $\beta$ s, as described in text. The four additional MFFs were generated for 334 residue chains having either i) the average Ramachandran maps over PNT's sequence ( $MFF_{av,PNT,334}$ ), ii) Ramachandran maps for poly(Ala) ( $MFF_{ala,334}$ ) or iii) poly(Gly) ( $MFF_{PNT,334}$ ), (**Fig. S4**) and iv) a heteropolymeric version of the PNT sequence where only the hydrophobic residues were attractive (AMVILFYW) ( $MFF_{hetero,334}$ ). To investigate length dependence, we also calculated a sixth MFF for a 144 residues chain, matched to the length of the FhuA plug domain ( $MFF_{PNT,144}$ ).

| Ensembles from Fig3 | $MFF_{PNT,334}$ | $MFF_{av,PNT,334}$ | $MFF_{ala,334}$ | $MFF_{gly,334}$ | $MFF_{hetero,334}$ | $MFF_{144}$   |
|---------------------|-----------------|--------------------|-----------------|-----------------|--------------------|---------------|
| 66.4<br>0.587       | 66.6<br>0.598   | 67.1<br>0.588      | 67.0<br>0.587   | 66.6<br>0.595   | 66.5<br>0.603      | 65.7<br>0.615 |
| 53.2<br>0.552       | 53.3<br>0.552   | 54.0<br>0.539      | 53.7<br>0.532   | 53.3<br>0.545   | 52.3<br>0.548      | 52.3<br>0.570 |
| 47.5<br>0.518       | 47.4<br>0.517   | 48.1<br>0.507      | 47.7<br>0.495   | 47.4<br>0.511   | 45.8<br>0.509      | 46.3<br>0.534 |
| 43.2<br>0.487       | 42.9<br>0.485   | 43.6<br>0.477      | 43.2<br>0.464   | 43.0<br>0.480   | 40.8<br>0.472      | 41.8<br>0.499 |
| 39.4<br>0.451       | 39.4<br>0.452   | 40.1<br>0.448      | 39.7<br>0.436   | 39.6<br>0.449   | 36.8<br>0.431      | 39.4<br>0.451 |

**Table S2:** Application of MFFs to fit to data in **Fig 2**. The three numbers in each box are (top to bottom) the  $R_g$  (Å),  $v$ , and  $\chi^2_r$  determined by fitting the experimental data to the listed MFF. Descriptions of MFFs are the same as in **Table S1**.

| Experiment Condition | MFF <sub>PNt,334</sub> | MFF <sub>av.PNt,334</sub> | MFF <sub>ala,334</sub> | MFF <sub>gly,334</sub> | MFF <sub>hetero,334</sub> | MFF <sub>144</sub> |
|----------------------|------------------------|---------------------------|------------------------|------------------------|---------------------------|--------------------|
| 250 mM Sarcosine     | 49.9                   | 50.7                      | 50.4                   | 50.0                   | 48.5                      | 48.9               |
|                      | 0.521                  | 0.511                     | 0.501                  | 0.516                  | 0.516                     | 0.541              |
|                      | 1.12                   | 1.11                      | 1.18                   | 1.20                   | 1.31                      | 1.33               |
| Water (150mM KCl)    | 51.1                   | 51.9                      | 51.6                   | 51.2                   | 50.1                      | 50.2               |
|                      | 0.542                  | 0.530                     | 0.523                  | 0.537                  | 0.540                     | 0.563              |
|                      | 1.11                   | 1.10                      | 1.16                   | 1.19                   | 1.24                      | 1.29               |
| 0.5M Gdn             | 55.5                   | 56.3                      | 56.1                   | 55.7                   | 55.0                      | 54.8               |
|                      | 0.566                  | 0.554                     | 0.551                  | 0.561                  | 0.567                     | 0.587              |
|                      | 1.04                   | 1.01                      | 1.04                   | 1.06                   | 1.07                      | 1.14               |
| 2M Gdn               | 58.7                   | 59.4                      | 59.2                   | 58.9                   | 58.5                      | 58.0               |
|                      | 0.584                  | 0.572                     | 0.572                  | 0.580                  | 0.587                     | 0.603              |
|                      | 0.986                  | 0.985                     | 1.01                   | 1.03                   | 1.01                      | 1.14               |
| 4M Gdn               | 62.2                   | 62.8                      | 62.8                   | 62.4                   | 62.3                      | 61.5               |
|                      | 0.601                  | 0.596                     | 0.594                  | 0.603                  | 0.608                     | 0.618              |
|                      | 0.946                  | 0.946                     | 0.946                  | 0.945                  | 0.946                     | 0.950              |

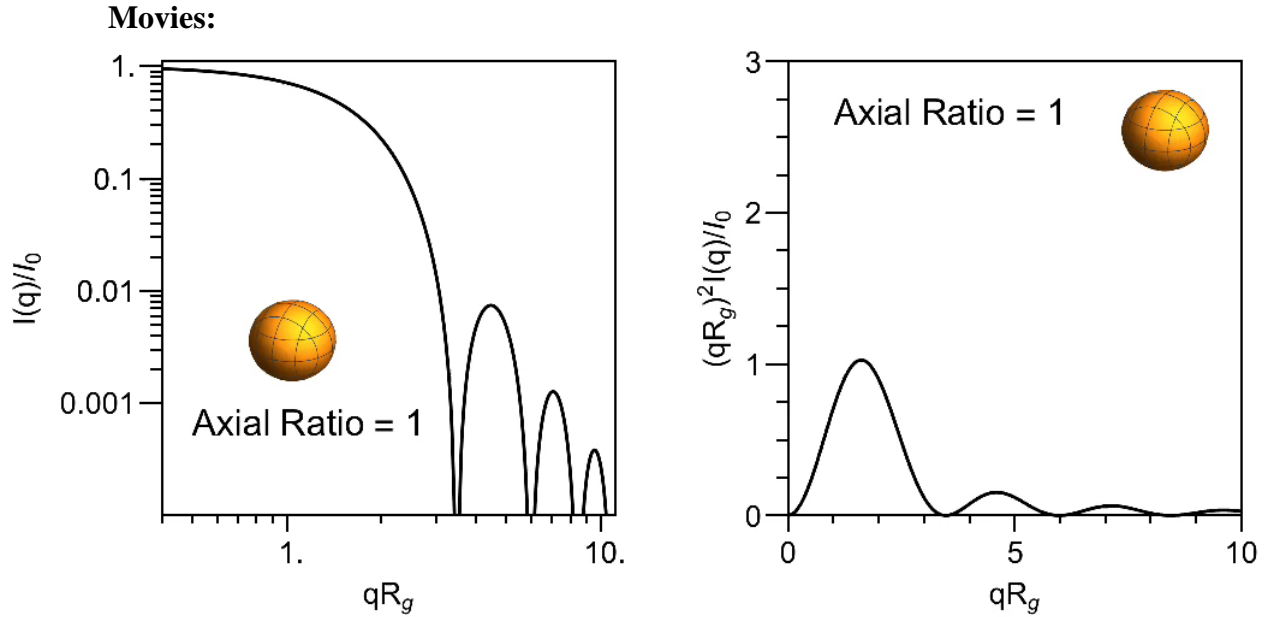

(Initial picture of movie found as attached file 'MovieS1.avi')

**Movie S1:** Prolate ellipsoid MFF. Running video changes the axial ratio. For ellipsoid, the  $R_g$  held constant as the axial ratio is changed for readers benefit.

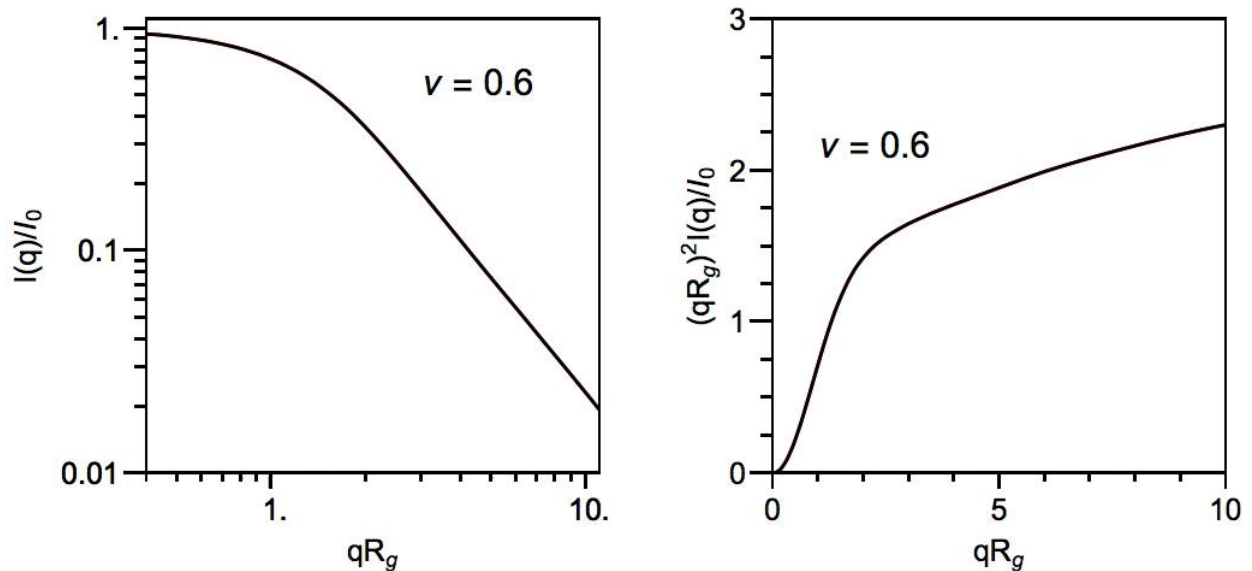

(Initial picture of movie found as attached file 'MovieS2.avi')

**Movie S2:** Disordered protein polymer MFF. Running video changes  $v$  of black curve. Red curve is held at  $v=0.6$ . Note that the x-axis on the left plot is dimensionless and is thus scaled during fitting process.

## References

1. J. E. Kohn, I. S. Millett, J. Jacob, B. Zagrovic, T. M. Dillon, N. Cingel, R. S. Dothager, S. Seifert, P. Thiyagarajan, T. R. Sosnick, M. Z. Hasan, V. S. Pande, I. Ruczinski, S. Doniach, K. W. Plaxco, Random-coil behavior and the dimensions of chemically unfolded proteins. *Proc. Natl. Acad. Sci. U.S.A.* **101**, 12491–12496 (2004). [doi:10.1073/pnas.0403643101](https://doi.org/10.1073/pnas.0403643101) [Medline](#)
2. K. A. Merchant, R. B. Best, J. M. Louis, I. V. Gopich, W. A. Eaton, Characterizing the unfolded states of proteins using single-molecule FRET spectroscopy and molecular simulations. *Proc. Natl. Acad. Sci. U.S.A.* **104**, 1528–1533 (2007). [doi:10.1073/pnas.0607097104](https://doi.org/10.1073/pnas.0607097104) [Medline](#)
3. G. Ziv, D. Thirumalai, G. Haran, Collapse transition in proteins. *Phys. Chem. Chem. Phys.* **11**, 83–93 (2009). [doi:10.1039/B813961J](https://doi.org/10.1039/B813961J) [Medline](#)
4. A. Dasgupta, J. B. Udgaonkar, Evidence for initial non-specific polypeptide chain collapse during the refolding of the SH3 domain of PI3 kinase. *J. Mol. Biol.* **403**, 430–445 (2010). [doi:10.1016/j.jmb.2010.08.046](https://doi.org/10.1016/j.jmb.2010.08.046) [Medline](#)
5. G. Haran, How, when and why proteins collapse: The relation to folding. *Curr. Opin. Struct. Biol.* **22**, 14–20 (2012). [doi:10.1016/j.sbi.2011.10.005](https://doi.org/10.1016/j.sbi.2011.10.005) [Medline](#)
6. A. Borgia, W. Zheng, K. Buholzer, M. B. Borgia, A. Schüler, H. Hofmann, A. Soranno, D. Nettels, K. Gast, A. Grishaev, R. B. Best, B. Schuler, consistent view of polypeptide chain expansion in chemical denaturants from multiple experimental methods. *J. Am. Chem. Soc.* **138**, 11714–11726 (2016). [doi:10.1021/jacs.6b05917](https://doi.org/10.1021/jacs.6b05917) [Medline](#)
7. H. Hofmann, A. Soranno, A. Borgia, K. Gast, D. Nettels, B. Schuler, Polymer scaling laws of unfolded and intrinsically disordered proteins quantified with single-molecule spectroscopy. *Proc. Natl. Acad. Sci. U.S.A.* **109**, 16155–16160 (2012). [doi:10.1073/pnas.1207719109](https://doi.org/10.1073/pnas.1207719109) [Medline](#)
8. V. A. Voelz, M. Jäger, S. Yao, Y. Chen, L. Zhu, S. A. Waldauer, G. R. Bowman, M. Friedrichs, O. Bakajin, L. J. Lapidus, S. Weiss, V. S. Pande, Slow unfolded-state structuring in Acyl-CoA binding protein folding revealed by simulation and experiment. *J. Am. Chem. Soc.* **134**, 12565–12577 (2012). [doi:10.1021/ja302528z](https://doi.org/10.1021/ja302528z) [Medline](#)
9. G. Reddy, D. Thirumalai, Collapse precedes folding in denaturant-dependent assembly of ubiquitin. *J. Phys. Chem. B* **121**, 995–1009 (2017). [doi:10.1021/acs.jpcc.6b13100](https://doi.org/10.1021/acs.jpcc.6b13100) [Medline](#)
10. K. W. Plaxco, I. S. Millett, D. J. Segel, S. Doniach, D. Baker, Chain collapse can occur concomitantly with the rate-limiting step in protein folding. *Nat. Struct. Biol.* **6**, 554–556 (1999). [doi:10.1038/9329](https://doi.org/10.1038/9329) [Medline](#)

11. T. Y. Yoo, S. P. Meisburger, J. Hinshaw, L. Pollack, G. Haran, T. R. Sosnick, K. Plaxco, Small-angle X-ray scattering and single-molecule FRET spectroscopy produce highly divergent views of the low-denaturant unfolded state. *J. Mol. Biol.* **418**, 226–236 (2012). [doi:10.1016/j.jmb.2012.01.016](https://doi.org/10.1016/j.jmb.2012.01.016) [Medline](#)
12. J. Jacob, B. Krantz, R. S. Dothager, P. Thiyagarajan, T. R. Sosnick, Early collapse is not an obligate step in protein folding. *J. Mol. Biol.* **338**, 369–382 (2004). [doi:10.1016/j.jmb.2004.02.065](https://doi.org/10.1016/j.jmb.2004.02.065) [Medline](#)
13. J. J. Skinner, W. Yu, E. K. Gichana, M. C. Baxa, J. R. Hinshaw, K. F. Freed, T. R. Sosnick, Benchmarking all-atom simulations using hydrogen exchange. *Proc. Natl. Acad. Sci. U.S.A.* **111**, 15975–15980 (2014). [doi:10.1073/pnas.1404213111](https://doi.org/10.1073/pnas.1404213111) [Medline](#)
14. Y. Wang, J. Trehwella, D. P. Goldenberg, Small-angle X-ray scattering of reduced ribonuclease A: Effects of solution conditions and comparisons with a computational model of unfolded proteins. *J. Mol. Biol.* **377**, 1576–1592 (2008). [doi:10.1016/j.jmb.2008.02.009](https://doi.org/10.1016/j.jmb.2008.02.009) [Medline](#)
15. S. V. Kathuria, C. Kayatekin, R. Barrea, E. Kondrashkina, R. Graceffa, L. Guo, R. P. Nobrega, S. Chakravarthy, C. R. Matthews, T. C. Irving, O. Bilsel, Microsecond barrier-limited chain collapse observed by time-resolved FRET and SAXS. *J. Mol. Biol.* **426**, 1980–1994 (2014). [doi:10.1016/j.jmb.2014.02.020](https://doi.org/10.1016/j.jmb.2014.02.020) [Medline](#)
16. J. Jacob, R. S. Dothager, P. Thiyagarajan, T. R. Sosnick, Fully reduced ribonuclease A does not expand at high denaturant concentration or temperature. *J. Mol. Biol.* **367**, 609–615 (2007). [doi:10.1016/j.jmb.2007.01.012](https://doi.org/10.1016/j.jmb.2007.01.012) [Medline](#)
17. T. Konuma, T. Kimura, S. Matsumoto, Y. Goto, T. Fujisawa, A. R. Fersht, S. Takahashi, Time-resolved small-angle X-ray scattering study of the folding dynamics of barnase. *J. Mol. Biol.* **405**, 1284–1294 (2011). [doi:10.1016/j.jmb.2010.11.052](https://doi.org/10.1016/j.jmb.2010.11.052) [Medline](#)
18. A. K. Svensson, O. Bilsel, E. Kondrashkina, J. A. Zitzewitz, C. R. Matthews, Mapping the folding free energy surface for metal-free human Cu,Zn superoxide dismutase. *J. Mol. Biol.* **364**, 1084–1102 (2006). [doi:10.1016/j.jmb.2006.09.005](https://doi.org/10.1016/j.jmb.2006.09.005) [Medline](#)
19. S. Piana, J. L. Klepeis, D. E. Shaw, Assessing the accuracy of physical models used in protein-folding simulations: Quantitative evidence from long molecular dynamics simulations. *Curr. Opin. Struct. Biol.* **24**, 98–105 (2014). [doi:10.1016/j.sbi.2013.12.006](https://doi.org/10.1016/j.sbi.2013.12.006) [Medline](#)
20. M. Junker, C. C. Schuster, A. V. McDonnell, K. A. Sorg, M. C. Finn, B. Berger, P. L. Clark, Pertactin beta-helix folding mechanism suggests common themes for the secretion and folding of autotransporter proteins. *Proc. Natl. Acad. Sci. U.S.A.* **103**, 4918–4923 (2006). [doi:10.1073/pnas.0507923103](https://doi.org/10.1073/pnas.0507923103) [Medline](#)

21. J. P. Renn, M. Junker, R. N. Besingi, E. Braselmann, P. L. Clark, ATP-independent control of autotransporter virulence protein transport via the folding properties of the secreted protein. *Chem. Biol.* **19**, 287–296 (2012). [doi:10.1016/j.chembiol.2011.11.009](https://doi.org/10.1016/j.chembiol.2011.11.009) [Medline](#)
22. E. Udho, K. S. Jakes, A. Finkelstein, TonB-dependent transporter FhuA in planar lipid bilayers: Partial exit of its plug from the barrel. *Biochemistry* **51**, 6753–6759 (2012). [doi:10.1021/bi300493u](https://doi.org/10.1021/bi300493u) [Medline](#)
23. P. X. Qi, T. R. Sosnick, S. W. Englander, The burst phase in ribonuclease A folding and solvent dependence of the unfolded state. *Nat. Struct. Biol.* **5**, 882–884 (1998). [doi:10.1038/2321](https://doi.org/10.1038/2321) [Medline](#)
24. J. Song, G. N. Gomes, C. C. Gradinaru, H. S. Chan, An adequate account of excluded volume is necessary to infer compactness and asphericity of disordered proteins by Förster resonance energy transfer. *J. Phys. Chem. B* **119**, 15191–15202 (2015). [doi:10.1021/acs.jpcc.5b09133](https://doi.org/10.1021/acs.jpcc.5b09133) [Medline](#)
25. H. M. Watkins, A. J. Simon, T. R. Sosnick, E. A. Lipman, R. P. Hjelm, K. W. Plaxco, Random coil negative control reproduces the discrepancy between scattering and FRET measurements of denatured protein dimensions. *Proc. Natl. Acad. Sci. U.S.A.* **112**, 6631–6636 (2015). [doi:10.1073/pnas.1418673112](https://doi.org/10.1073/pnas.1418673112) [Medline](#)
26. R. K. Das, K. M. Ruff, R. V. Pappu, Relating sequence encoded information to form and function of intrinsically disordered proteins. *Curr. Opin. Struct. Biol.* **32**, 102–112 (2015). [doi:10.1016/j.sbi.2015.03.008](https://doi.org/10.1016/j.sbi.2015.03.008) [Medline](#)
27. J. A. Riback, C. D. Katanski, J. L. Kear-Scott, E. V. Pilipenko, A. E. Rojek, T. R. Sosnick, D. A. Drummond, Stress-triggered phase separation is an adaptive, evolutionarily tuned response. *Cell* **168**, 1028–1040.e19 (2017). [doi:10.1016/j.cell.2017.02.027](https://doi.org/10.1016/j.cell.2017.02.027)
28. P. Tompa, G. D. Rose, The Levinthal paradox of the interactome. *Protein Sci.* **20**, 2074–2079 (2011). [doi:10.1002/pro.747](https://doi.org/10.1002/pro.747) [Medline](#)
29. M. Junker, P. L. Clark, Slow formation of aggregation-resistant beta-sheet folding intermediates. *Proteins* **78**, 812–824 (2010). [doi:10.1002/prot.22609](https://doi.org/10.1002/prot.22609) [Medline](#)
30. J. M. Jumper, K. F. Freed, T. R. Sosnick, Rapid calculation of side chain packing and free energy with applications to protein molecular dynamics. <https://arxiv.org/abs/1610.07277> (2017).
31. J. B. Xu, B. Berger, Fast and accurate algorithms for protein side-chain packing. *J. Assoc. Comput. Mach.* **53**, 533–557 (2006). [doi:10.1145/1162349.1162350](https://doi.org/10.1145/1162349.1162350)
32. D. Schneidman-Duhovny, M. Hammel, J. A. Tainer, A. Sali, Accurate SAXS profile computation and its assessment by contrast variation experiments. *Biophys. J.* **105**, 962–974 (2013). [doi:10.1016/j.bpj.2013.07.020](https://doi.org/10.1016/j.bpj.2013.07.020) [Medline](#)

33. C. J. Knight, J. S. Hub, WAXSiS: A web server for the calculation of SAXS/WAXS curves based on explicit-solvent molecular dynamics. *Nucleic Acids Res.* **43**, W225–W230 (2015). [doi:10.1093/nar/gkv309](https://doi.org/10.1093/nar/gkv309) [Medline](#)
34. T. Ohta, Y. Oono, K. F. Freed, Static-coherent-scattering function for a single polymer-chain: Conformational space renormalization of polymers. V. *Phys. Rev. A* **25**, 2801–2811 (1982). [doi:10.1103/PhysRevA.25.2801](https://doi.org/10.1103/PhysRevA.25.2801)
35. G. Wang, R. L. Dunbrack Jr., PISCES: A protein sequence culling server. *Bioinformatics* **19**, 1589–1591 (2003). [doi:10.1093/bioinformatics/btg224](https://doi.org/10.1093/bioinformatics/btg224) [Medline](#)
36. T. P. Hopp, K. R. Woods, Prediction of protein antigenic determinants from amino acid sequences. *Proc. Natl. Acad. Sci. U.S.A.* **78**, 3824–3828 (1981). [doi:10.1073/pnas.78.6.3824](https://doi.org/10.1073/pnas.78.6.3824) [Medline](#)
37. P. Debye, Molecular-weight determination by light scattering. *J. Phys. Colloid Chem.* **51**, 18–32 (1947). [doi:10.1021/j150451a002](https://doi.org/10.1021/j150451a002) [Medline](#)
38. J. A. Capp, A. Hagarman, D. C. Richardson, T. G. Oas, The statistical conformation of a highly flexible protein: Small-angle X-ray scattering of *S. aureus* protein A. *Structure* **22**, 1184–1195 (2014). [doi:10.1016/j.str.2014.06.011](https://doi.org/10.1016/j.str.2014.06.011) [Medline](#)
39. B. Hammouda, SANS from homogeneous polymer mixtures—a unified overview. *Adv. Polym. Sci.* **106**, 87–133 (1993). [doi:10.1007/BFb0025862](https://doi.org/10.1007/BFb0025862)
40. T. Ohta, Y. Oono, K. F. Freed, Static scattering function for a polymer-chain in a good solvent. *Macromolecules* **14**, 1588–1590 (1981). [doi:10.1021/ma50006a087](https://doi.org/10.1021/ma50006a087)
